# Supplementary material for: An NCN-pincer ligand dysprosium single-ion magnet showing magnetic relaxation via the second excited state
Source: PubMed Central journal article supplement — Sci Rep. 2014 Jun 27;4:5471. doi: 10.1038/srep05471 (PMC4073120; doi:10.1038/srep05471), 2014-06-27
Supplement: srep05471-s1.pdf [file srep05471-s1.pdf]

# Supporting Information for:

## **An NCN-pincer ligand dysprosium single-ion magnet showing magnetic relaxation *via* the second excited state**

**Yun-Nan Guo<sup>1,3</sup>, Liviu Ungur<sup>4</sup>, Garrett E. Granroth<sup>5</sup>, Annie K. Powell<sup>6</sup>, Chunji Wu<sup>2</sup>, Stephen E. Nagler<sup>5</sup>, Jinkui Tang<sup>1,\*</sup>, Liviu F. Chibotaru<sup>4,\*</sup> & Dongmei Cui<sup>2,\*</sup>**

<sup>1</sup> State Key Laboratory of Rare Earth Resource Utilization, Changchun Institute of Applied Chemistry, Chinese Academy of Sciences, Changchun 130022, P. R. China. Fax: (+)86-431-85262878; E-mail: [tang@ciac.ac.cn](mailto:tang@ciac.ac.cn); <sup>2</sup> State Key Laboratory of Polymer Physics and Chemistry, Changchun Institute of Applied Chemistry, Chinese Academy of Sciences, Changchun 130022, P. R. China; <sup>3</sup> School of Science, Xi'an Jiaotong University, Xi'an 710049, P. R. China; <sup>4</sup> Division of Quantum and Physical Chemistry, Department of Chemistry, Katholieke Universiteit Leuven, Celestijnenlaan 200F, 3001 Leuven, Belgium; <sup>5</sup> Oak Ridge National Laboratory, Oak Ridge, Tennessee 37831, USA; <sup>6</sup> Institute of Inorganic Chemistry, Karlsruhe Institute of Technology, Engesserstrasse 15, 76131 Karlsruhe, Germany and Institute of Nanotechnology, Karlsruhe Institute of Technology, Hermann-von-Helmholtz-Platz 1, Eggensteinn-Leopoldshafen, 76344 Karlsruhe, Germany

## **Contents**

- 1 Computational details (Fig. S1-S2, Tables S1-S4).
- 2 Electronic and magnetic properties of individual Dy centers (Fig. S3-S8, Tables S5-S12).
- 3 Inelastic neutron scattering measurements (Fig. S8).
- 4 Alternating current (ac) magnetic susceptibility measurements (Fig. S9-S10).
- 5 References.

# 1 Computational details

The ab initio calculations of DyNCN have been done with Molcas 7.8 package.<sup>1</sup> In these calculations, the relativistic effects are taken into account in two steps, both based on the Douglas-Kroll Hamiltonian.<sup>2</sup> In the first step, scalar relativistic effects are already taken into account in the basis set generation. Further, spin-free eigenstates are obtained in the Complete Active Space Self Consistent Field (CASSCF) method.<sup>3</sup> The active space of the CASSCF included the 9 electrons spanning seven 4f orbitals of the Dy<sup>3+</sup> ion, unless otherwise specified. The spin-orbit coupling is considered in the next step (RASSI),<sup>4</sup> which uses spin-free eigenstates as input, and in their basis computes the matrix elements of the magnetic moment. In the last step, the SINGLE\_ANISO module computes all magnetic properties and parameters of the pseudo-spin Hamiltonians on the basis of the above calculated spin-orbit eigenstates and matrix elements of the magnetic moment. This method has been successfully applied for the elucidation of the local electronic and magnetic properties of other lanthanide complexes.<sup>5</sup>

Two structural models for the mononuclear Dy fragments have been employed: fragment **A** (small), **B** (larger) and **C** (entire molecule). Structure of the structural model **A** and **B** are shown in Figures S1 and S2 respectively.

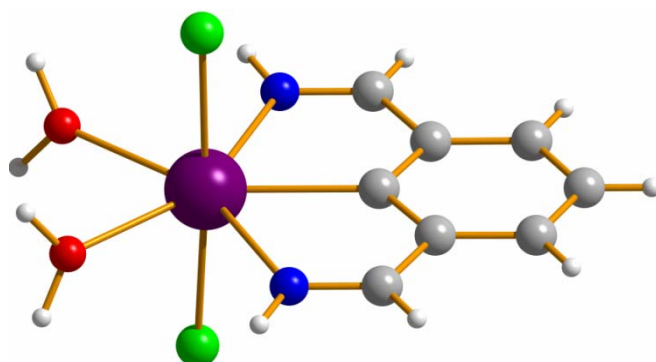

Fig. S1 Structure of the fragment **A** of the molecule.

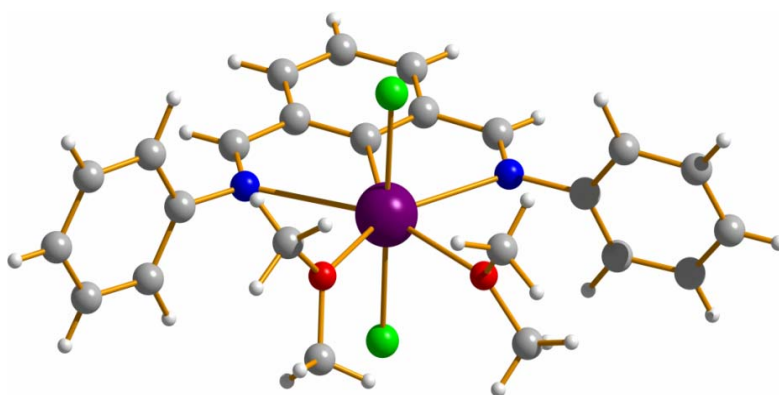

Fig. S2 Structure of the fragment **B** of the molecule.

Three basis set approximations have been employed: **1** – small, **2** – larger, and **3** – even larger. Table S1 shows the contractions of the employed basis sets for all elements.

All in all we have the following computational models: **A1, A2, B1, B2, C1, C2** and **C3**;

Table S1. Contractions of the employed basis sets in computational approximations **1** and **2**.

| Basis 1                  | Basis 2                       | Basis 3                           |
|--------------------------|-------------------------------|-----------------------------------|
| Dy.ANO-RCC...7s6p4d3f1g. | Dy.ANO-RCC...8s7p5d4f2g1h.    | Dy.ANO-RCC...9s8p5d4f3g2h.        |
| Cl.ANO-RCC...4s3p.       | Cl.ANO-RCC...5s4p2d.          | Cl.ANO-RCC...6s5p3d2f1g.          |
| O.ANO-RCC...3s2p.        | O.ANO-RCC...4s3p2d.           | O.ANO-RCC...5s4p3d2f1g.           |
| N.ANO-RCC...3s2p.        | N.ANO-RCC...4s3p2d.           | N.ANO-RCC...5s4p3d2f1g.           |
| C.ANO-RCC...3s2p. (all)  | C.ANO-RCC...4s3p2d. (closest) | C.ANO-RCC...5s4p3d2f1g. (closest) |
| H.ANO-RCC...2s.          | C.ANO-RCC...3s2p. (distant)   | C.ANO-RCC...4s3p2d. (medium)      |
|                          | H.ANO-RCC...2s.               | C.ANO-RCC...3s2p. (distant)       |
|                          |                               | H.ANO-RCC...2s.                   |

Active space of the CASSCF method included 9 electrons in 7 orbitals (4f orbitals of Dy<sup>3+</sup> ion).

We have mixed 21 sextets, 128 quartet and 130 doublet states by spin-orbit coupling.

On the basis of the resulting spin-orbital multiplets SINGLE\_ANISO program computed local magnetic properties (g-tensors, magnetic axes, local magnetic susceptibility, etc.)

Table S2. Cartesian atomic coordinates of the structural model **A** (in Angstrom).

| Atom | X           | Y           | Z           |
|------|-------------|-------------|-------------|
| Dy1  | 0.0000000   | 0.0000000   | 0.07483997  |
| Cl2  | 0.12799602  | -2.59167289 | 0.15403593  |
| Cl3  | -0.12799602 | 2.59167289  | 0.15403593  |
| O4   | -1.49433608 | 0.03051414  | 2.01415102  |
| O5   | 1.49433608  | -0.03051414 | 2.01415102  |
| N6   | -2.43535991 | -0.07028578 | -1.01467016 |
| N7   | 2.43535991  | 0.07028578  | -1.01467016 |
| C8   | -2.43096661 | -0.06761297 | -2.29813968 |
| C9   | -1.18700315 | -0.04373029 | -3.06181500 |
| C10  | 0.00000000  | 0.00000000  | -2.31843365 |
| C11  | -1.19090729 | -0.03923611 | -4.45622958 |
| C12  | 0.00000000  | 0.00000000  | -5.14869925 |
| C13  | 2.43096661  | 0.06761297  | -2.29813968 |
| C14  | 1.18700315  | 0.04373029  | -3.06181500 |
| C15  | 1.19090729  | 0.03923611  | -4.45622958 |
| H16  | -3.24172096 | -0.08087504 | -2.75457711 |
| H17  | -1.99819548 | -0.06151598 | -4.91853599 |
| H18  | 0.00000000  | 0.00000000  | -6.07826182 |
| H19  | 3.24172096  | 0.08087504  | -2.75457711 |
| H20  | 1.99819548  | 0.06151598  | -4.91853599 |
| H21  | -3.33567767 | -0.05887911 | -0.57958646 |
| H22  | 3.33567767  | 0.05887911  | -0.57958646 |
| H23  | -2.02895769 | 0.74083792  | 2.37639384  |
| H24  | -1.55819788 | -0.72295302 | 2.60559748  |
| H25  | 1.55819788  | 0.72295302  | 2.60559748  |
| H26  | 2.02895769  | -0.74083792 | 2.37639384  |

Table S3. Cartesian atomic coordinates of the structural model **B** (in Angstrom).

| Atom | X           | Y           | Z           |
|------|-------------|-------------|-------------|
| Dy1  | 0.0000000   | 0.0000000   | 0.07483997  |
| Cl2  | 0.12799602  | -2.59167289 | 0.15403593  |
| Cl3  | -0.12799602 | 2.59167289  | 0.15403593  |
| O4   | -1.49433608 | 0.03051414  | 2.01415102  |
| O5   | 1.49433608  | -0.03051414 | 2.01415102  |
| N6   | -2.43535991 | -0.07028578 | -1.01467016 |
| N7   | 2.43535991  | 0.07028578  | -1.01467016 |
| C8   | -4.29501058 | -1.26128941 | 0.05461671  |
| C9   | -2.43096661 | -0.06761297 | -2.29813968 |
| C10  | -6.21907737 | -0.03392313 | 0.84473783  |
| C11  | -5.53739361 | -1.22038381 | 0.67192093  |
| C12  | -4.41005248 | 1.16587624  | -0.22263986 |
| C13  | -3.73937669 | -0.05376440 | -0.38449660 |
| C14  | -5.65114197 | 1.14066303  | 0.40371533  |
| C15  | -2.30447839 | 1.10690786  | 2.56307802  |
| C16  | -1.59141548 | -1.11486761 | 2.91323730  |
| C17  | -1.18700315 | -0.04373029 | -3.06181500 |
| C18  | 0.00000000  | 0.00000000  | -2.31843365 |
| C19  | -1.19090729 | -0.03923611 | -4.45622958 |
| C20  | 0.00000000  | 0.00000000  | -5.14869925 |

|            |             |             |             |
|------------|-------------|-------------|-------------|
| <b>C21</b> | 4.29501058  | 1.26128941  | 0.05461671  |
| <b>C22</b> | 2.43096661  | 0.06761297  | -2.29813968 |
| <b>C23</b> | 6.21907737  | 0.03392313  | 0.84473783  |
| <b>C24</b> | 5.53739361  | 1.22038381  | 0.67192093  |
| <b>C25</b> | 4.41005248  | -1.16587624 | -0.22263986 |
| <b>C26</b> | 3.73937669  | 0.05376440  | -0.38449660 |
| <b>C27</b> | 5.65114197  | -1.14066303 | 0.40371533  |
| <b>C28</b> | 1.18700315  | 0.04373029  | -3.06181500 |
| <b>C29</b> | 1.19090729  | 0.03923611  | -4.45622958 |
| <b>C30</b> | 2.30447839  | -1.10690786 | 2.56307802  |
| <b>C31</b> | 1.59141548  | 1.11486761  | 2.91323730  |
| <b>H32</b> | -3.24172096 | -0.08087504 | -2.75457711 |
| <b>H33</b> | -7.05278172 | -0.02622923 | 1.25584971  |
| <b>H34</b> | -5.91992792 | -2.01241461 | 0.97548187  |
| <b>H35</b> | -6.11177422 | 1.93855830  | 0.52823683  |
| <b>H36</b> | -2.80552726 | 1.55172598  | 1.86311302  |
| <b>H37</b> | -1.74658841 | 1.76128373  | 3.01223225  |
| <b>H38</b> | -0.70838188 | -1.42719360 | 3.16291670  |
| <b>H39</b> | -2.06912507 | -1.84308213 | 2.48671049  |
| <b>H40</b> | -1.99819548 | -0.06151598 | -4.91853599 |
| <b>H41</b> | 0.00000000  | 0.00000000  | -6.07826182 |
| <b>H42</b> | 3.24172096  | 0.08087504  | -2.75457711 |
| <b>H43</b> | 7.05278172  | 0.02622923  | 1.25584971  |
| <b>H44</b> | 5.91992792  | 2.01241461  | 0.97548187  |
| <b>H45</b> | 6.11177422  | -1.93855830 | 0.52823683  |
| <b>H46</b> | 1.99819548  | 0.06151598  | -4.91853599 |
| <b>H47</b> | 2.80552726  | -1.55172598 | 1.86311302  |
| <b>H48</b> | 1.74658841  | -1.76128373 | 3.01223225  |
| <b>H49</b> | 0.70838188  | 1.42719360  | 3.16291670  |
| <b>H50</b> | 2.06912507  | 1.84308213  | 2.48671049  |
| <b>H51</b> | -4.00433890 | 2.09463687  | -0.56571446 |
| <b>H52</b> | -3.81137740 | -2.20305406 | -0.10055514 |
| <b>H53</b> | 3.81137740  | 2.20305406  | -0.10055514 |
| <b>H54</b> | 4.00433890  | -2.09463687 | -0.56571446 |
| <b>H55</b> | -2.96480471 | 0.63144184  | 3.25791701  |
| <b>H56</b> | -2.12481130 | -0.76804949 | 3.77353149  |
| <b>H57</b> | 2.96480471  | -0.63144184 | 3.25791701  |
| <b>H58</b> | 2.12481130  | 0.76804949  | 3.77353149  |

Table S4. Cartesian atomic coordinates of the structural model C -- the entire molecule (in Angstrom).

| <b>Atom</b> | <b>X</b>    | <b>Y</b>    | <b>Z</b>    |
|-------------|-------------|-------------|-------------|
| <b>Dy1</b>  | 0.00000000  | 0.00000000  | 0.07483997  |
| <b>Cl2</b>  | 0.12799602  | -2.59167289 | 0.15403593  |
| <b>Cl3</b>  | -0.12799602 | 2.59167289  | 0.15403593  |
| <b>O4</b>   | -1.49433608 | 0.03051414  | 2.01415102  |
| <b>O5</b>   | 1.49433608  | -0.03051414 | 2.01415102  |
| <b>N6</b>   | -2.43535991 | -0.07028578 | -1.01467016 |
| <b>N7</b>   | 2.43535991  | 0.07028578  | -1.01467016 |
| <b>C8</b>   | -4.29501058 | -1.26128941 | 0.05461671  |
| <b>C9</b>   | -2.43096661 | -0.06761297 | -2.29813968 |
| <b>C10</b>  | -3.61511330 | -2.58523337 | -0.16352573 |
| <b>C11</b>  | -6.21907737 | -0.03392313 | 0.84473783  |
| <b>C12</b>  | -5.53739361 | -1.22038381 | 0.67192093  |
| <b>C13</b>  | -4.03151334 | -3.25398846 | -1.44190408 |
| <b>C14</b>  | -4.41005248 | 1.16587624  | -0.22263986 |
| <b>C15</b>  | -3.73937669 | -0.05376440 | -0.38449660 |
| <b>C16</b>  | -3.83841851 | 2.47446230  | -0.70601805 |
| <b>C17</b>  | -5.65114197 | 1.14066303  | 0.40371533  |
| <b>C18</b>  | -4.36563696 | 2.88418842  | -2.08303780 |
| <b>C19</b>  | -2.30447839 | 1.10690786  | 2.56307802  |
| <b>C20</b>  | -1.59141548 | -1.11486761 | 2.91323730  |
| <b>C21</b>  | -3.23295974 | 0.43835760  | 3.54008746  |
| <b>C22</b>  | -2.34045132 | -0.62783867 | 4.12132923  |
| <b>C23</b>  | -1.18700315 | -0.04373029 | -3.06181500 |
| <b>C24</b>  | 0.00000000  | 0.00000000  | -2.31843365 |
| <b>C25</b>  | -1.19090729 | -0.03923611 | -4.45622958 |
| <b>C26</b>  | 0.00000000  | 0.00000000  | -5.14869925 |
| <b>C27</b>  | 4.29501058  | 1.26128941  | 0.05461671  |
| <b>C28</b>  | 2.43096661  | 0.06761297  | -2.29813968 |
| <b>C29</b>  | 3.61511330  | 2.58523337  | -0.16352573 |
| <b>C30</b>  | 6.21907737  | 0.03392313  | 0.84473783  |
| <b>C31</b>  | 5.53739361  | 1.22038381  | 0.67192093  |
| <b>C32</b>  | 4.03151334  | 3.25398846  | -1.44190408 |
| <b>C33</b>  | 4.41005248  | -1.16587624 | -0.22263986 |
| <b>C34</b>  | 3.73937669  | 0.05376440  | -0.38449660 |

|            |             |             |             |
|------------|-------------|-------------|-------------|
| <b>C35</b> | 3.83841851  | -2.47446230 | -0.70601805 |
| <b>C36</b> | 5.65114197  | -1.14066303 | 0.40371533  |
| <b>C37</b> | 4.36563696  | -2.88418842 | -2.08303780 |
| <b>C38</b> | 1.18700315  | 0.04373029  | -3.06181500 |
| <b>C39</b> | 1.19090729  | 0.03923611  | -4.45622958 |
| <b>C40</b> | 2.30447839  | -1.10690786 | 2.56307802  |
| <b>C41</b> | 1.59141548  | 1.11486761  | 2.91323730  |
| <b>C42</b> | 3.23295974  | -0.43835760 | 3.54008746  |
| <b>C43</b> | 2.34045132  | 0.62783867  | 4.12132923  |
| <b>H44</b> | -3.24172096 | -0.08087504 | -2.75457711 |
| <b>H45</b> | -2.65422315 | -2.44952586 | -0.17710218 |
| <b>H46</b> | -3.82050548 | -3.17262876 | 0.58084558  |
| <b>H47</b> | -7.05278172 | -0.02622923 | 1.25584971  |
| <b>H48</b> | -5.91992792 | -2.01241461 | 0.97548187  |
| <b>H49</b> | -4.98589461 | -3.36617408 | -1.44890444 |
| <b>H50</b> | -3.60908190 | -4.11359499 | -1.50618009 |
| <b>H51</b> | -3.76829847 | -2.71071054 | -2.18818458 |
| <b>H52</b> | -2.87097285 | 2.40061294  | -0.74710096 |
| <b>H53</b> | -4.05558435 | 3.17101052  | -0.06615713 |
| <b>H54</b> | -6.11177422 | 1.93855830  | 0.52823683  |
| <b>H55</b> | -4.11660906 | 2.21941777  | -2.73004050 |
| <b>H56</b> | -3.98683576 | 3.73004115  | -2.33179796 |
| <b>H57</b> | -5.32273982 | 2.95685398  | -2.05036947 |
| <b>H58</b> | -2.80552726 | 1.55172598  | 1.86311302  |
| <b>H59</b> | -1.74658841 | 1.76128373  | 3.01223225  |
| <b>H60</b> | -0.70838188 | -1.42719360 | 3.16291670  |
| <b>H61</b> | -2.06912507 | -1.84308213 | 2.48671049  |
| <b>H62</b> | -4.00246367 | 0.05370134  | 3.09284242  |
| <b>H63</b> | -3.53698953 | 1.05831578  | 4.22209195  |
| <b>H64</b> | -1.73742108 | -0.26012373 | 4.78622174  |
| <b>H65</b> | -2.86064261 | -1.34055641 | 4.52459223  |
| <b>H66</b> | -1.99819548 | -0.06151598 | -4.91853599 |
| <b>H67</b> | 0.00000000  | 0.00000000  | -6.07826182 |
| <b>H68</b> | 3.24172096  | 0.08087504  | -2.75457711 |
| <b>H69</b> | 2.65422315  | 2.44952586  | -0.17710218 |
| <b>H70</b> | 3.82050548  | 3.17262876  | 0.58084558  |
| <b>H71</b> | 7.05278172  | 0.02622923  | 1.25584971  |
| <b>H72</b> | 5.91992792  | 2.01241461  | 0.97548187  |
| <b>H73</b> | 4.98589461  | 3.36617408  | -1.44890444 |
| <b>H74</b> | 3.60908190  | 4.11359499  | -1.50618009 |
| <b>H75</b> | 3.76829847  | 2.71071054  | -2.18818458 |
| <b>H76</b> | 2.87097285  | -2.40061294 | -0.74710096 |
| <b>H77</b> | 4.05558435  | -3.17101052 | -0.06615713 |
| <b>H78</b> | 6.11177422  | -1.93855830 | 0.52823683  |
| <b>H79</b> | 4.11660906  | -2.21941777 | -2.73004050 |
| <b>H80</b> | 3.98683576  | -3.73004115 | -2.33179796 |
| <b>H81</b> | 5.32273982  | -2.95685398 | -2.05036947 |
| <b>H82</b> | 1.99819548  | 0.06151598  | -4.91853599 |
| <b>H83</b> | 2.80552726  | -1.55172598 | 1.86311302  |
| <b>H84</b> | 1.74658841  | -1.76128373 | 3.01223225  |
| <b>H85</b> | 0.70838188  | 1.42719360  | 3.16291670  |
| <b>H86</b> | 2.06912507  | 1.84308213  | 2.48671049  |
| <b>H87</b> | 4.00246367  | -0.05370134 | 3.09284242  |
| <b>H88</b> | 3.53698953  | -1.05831578 | 4.22209195  |
| <b>H89</b> | 1.73742108  | 0.26012373  | 4.78622174  |
| <b>H90</b> | 2.86064261  | 1.34055641  | 4.52459223  |

## 2 Electronic and magnetic properties of individual Dy centers

Table S5. Energies of the lowest Kramers doublets ( $\text{cm}^{-1}$ ). (roots corresponding to the  $^6\text{H}$ ,  $^6\text{F}$  and  $^6\text{P}$  ionic multiplets were optimized *together* in a single state-average CASSCF calculation; *method 1*)

| A1       | A2       | B1       | B2       | C1       | C2       | C3       |
|----------|----------|----------|----------|----------|----------|----------|
| 0.000    | 0.000    | 0.000    | 0.000    | 0.000    | 0.000    | 0.000    |
| 143.600  | 44.004   | 169.284  | 152.165  | 173.422  | 157.205  | 160.251  |
| 283.435  | 126.845  | 342.071  | 178.238  | 350.935  | 221.422  | 216.679  |
| 326.412  | 226.299  | 444.122  | 298.166  | 457.187  | 312.608  | 316.002  |
| 359.021  | 279.699  | 464.155  | 371.700  | 497.952  | 397.193  | 399.101  |
| 433.162  | 356.902  | 528.949  | 445.090  | 548.205  | 462.642  | 467.423  |
| 468.077  | 400.951  | 585.554  | 505.520  | 609.094  | 518.103  | 525.846  |
| 512.690  | 436.098  | 628.383  | 539.766  | 657.864  | 561.729  | 571.403  |
| 3611.383 | 3589.726 | 3626.119 | 3605.682 | 3629.033 | 3609.451 | 3611.387 |
| 3757.832 | 3668.796 | 3802.422 | 3752.328 | 3809.952 | 3766.014 | 3767.415 |
| 3828.252 | 3709.364 | 3893.524 | 3790.244 | 3904.834 | 3818.538 | 3818.717 |
| 3874.298 | 3749.716 | 3960.161 | 3830.131 | 3976.530 | 3852.617 | 3854.376 |
| 3908.999 | 3800.465 | 4013.893 | 3884.744 | 4035.535 | 3905.056 | 3908.683 |
| 3940.513 | 3858.332 | 4055.591 | 3953.250 | 4079.347 | 3972.171 | 3977.805 |
| 3978.237 | 3928.255 | 4098.081 | 4028.663 | 4128.000 | 4043.388 | 4051.570 |
| ...      | ...      | ...      | ...      | ...      | ...      | ...      |

Table S6. Energies of the lowest Kramers doublets ( $\text{cm}^{-1}$ ). (roots corresponding to the  $^6\text{H}$ ,  $^6\text{F}$  and  $^6\text{P}$  ionic multiplets were optimized *separately* in three different CASSCF calculations; *method 2*)

| A1       | A2       | B1       | B2       | C1       | C2       | C3       |
|----------|----------|----------|----------|----------|----------|----------|
| 0.000    | 0.000    | 0.000    | 0.000    | 0.000    | 0.000    | 0.000    |
| 154.921  | 59.269   | 184.185  | 166.097  | 189.082  | 172.300  | 176.025  |
| 308.508  | 135.599  | 373.517  | 216.210  | 383.749  | 266.583  | 262.595  |
| 372.970  | 243.103  | 491.334  | 326.555  | 505.677  | 344.067  | 348.429  |
| 395.360  | 304.860  | 527.667  | 412.586  | 564.645  | 442.294  | 445.506  |
| 471.266  | 394.807  | 581.309  | 498.503  | 604.761  | 520.285  | 526.797  |
| 512.274  | 452.830  | 644.284  | 573.093  | 670.414  | 587.106  | 597.470  |
| 560.421  | 486.339  | 692.225  | 607.687  | 725.904  | 632.845  | 645.697  |
| 3619.224 | 3595.507 | 3636.334 | 3614.472 | 3639.735 | 3619.049 | 3621.242 |
| 3779.335 | 3686.362 | 3829.859 | 3777.500 | 3838.472 | 3793.124 | 3795.172 |
| 3857.800 | 3727.391 | 3931.675 | 3825.958 | 3944.640 | 3857.739 | 3859.063 |
| 3910.739 | 3774.599 | 4007.712 | 3869.822 | 4026.215 | 3897.483 | 3900.148 |
| 3952.137 | 3833.413 | 4070.142 | 3933.188 | 4094.127 | 3957.825 | 3962.878 |
| 3986.623 | 3901.896 | 4117.637 | 4012.819 | 4144.687 | 4035.239 | 4042.998 |
| 4028.978 | 3984.506 | 4165.514 | 4101.186 | 4199.749 | 4118.458 | 4129.523 |
| ...      | ...      | ...      | ...      | ...      | ...      | ...      |

Table S7. Energies ( $\text{cm}^{-1}$ ) and g tensors of the lowest Kramers doublets (KD) (*method 1*).

| KD | A1             |        | A2      |        | B1      |        | B2      |        | C1      |        | C2      |        | C3      |        |         |
|----|----------------|--------|---------|--------|---------|--------|---------|--------|---------|--------|---------|--------|---------|--------|---------|
|    | E              | g      | E       | g      | E       | g      | E       | g      | E       | g      | E       | g      | E       | g      |         |
| 1  | g <sub>x</sub> | 0.0110 |         | 0.0027 |         | 0.0066 |         | 0.0011 |         | 0.0069 |         | 0.0016 |         | 0.0016 |         |
|    | g <sub>y</sub> | 0.000  | 0.0186  | 0.000  | 0.0232  | 0.000  | 0.0108  | 0.000  | 0.0032  | 0.000  | 0.0111  | 0.000  | 0.0034  | 0.000  | 0.0035  |
|    | g <sub>z</sub> |        | 19.7006 |        | 19.7908 |        | 19.7124 |        | 19.8005 |        | 19.7051 |        | 19.7893 |        | 19.7869 |

|          |                |         |         |         |         |         |         |         |        |         |        |         |        |         |        |
|----------|----------------|---------|---------|---------|---------|---------|---------|---------|--------|---------|--------|---------|--------|---------|--------|
| <b>2</b> | g <sub>X</sub> | 0.1866  | 0.0008  | 0.1128  | 0.1179  | 0.1162  | 0.0026  | 0.0064  |        |         |        |         |        |         |        |
|          | g <sub>Y</sub> | 143.600 | 0.2550  | 44.004  | 0.0130  | 169.284 | 0.1460  | 152.165 | 0.4091 | 173.422 | 0.1515 | 157.205 | 0.0332 | 160.251 | 0.0583 |
|          | g <sub>Z</sub> | 16.7450 | 19.8253 | 16.8063 | 16.8443 | 16.7852 | 17.0289 | 17.0102 |        |         |        |         |        |         |        |
| <b>3</b> | g <sub>X</sub> | 2.4192  | 0.2858  | 1.4375  | 0.0854  | 1.4687  | 0.2157  | 0.1711  |        |         |        |         |        |         |        |
|          | g <sub>Y</sub> | 283.435 | 3.8642  | 126.845 | 0.3192  | 342.071 | 2.0825  | 178.238 | 0.3255 | 350.935 | 2.1617 | 221.422 | 0.2773 | 216.679 | 0.2670 |
|          | g <sub>Z</sub> | 12.1846 | 16.9593 | 13.2580 | 19.2958 | 13.1859 | 19.5973 | 19.5914 |        |         |        |         |        |         |        |
| <b>4</b> | g <sub>X</sub> | 0.1955  | 9.2981  | 5.7547  | 2.7778  | 5.7535  | 1.9635  | 2.1349  |        |         |        |         |        |         |        |
|          | g <sub>Y</sub> | 326.412 | 0.4470  | 226.299 | 8.2202  | 444.122 | 6.5631  | 298.166 | 3.2095 | 457.187 | 6.0982 | 312.608 | 2.2290 | 316.002 | 2.3052 |
|          | g <sub>Z</sub> | 19.2568 | 4.3589  | 7.4275  | 12.7155 | 7.9628  | 13.1812 | 13.1412 |        |         |        |         |        |         |        |
| <b>5</b> | g <sub>X</sub> | 9.1850  | 1.8922  | 0.1106  | 8.3936  | 0.1618  | 8.3293  | 8.4013  |        |         |        |         |        |         |        |
|          | g <sub>Y</sub> | 359.021 | 6.2810  | 279.699 | 2.6270  | 464.155 | 0.4679  | 371.700 | 7.5527 | 497.952 | 0.4531 | 397.193 | 7.2071 | 399.101 | 7.3276 |
|          | g <sub>Z</sub> | 3.0625  | 9.5480  | 18.3404 | 3.9321  | 18.8972 | 5.3714  | 5.1198  |        |         |        |         |        |         |        |
| <b>6</b> | g <sub>X</sub> | 0.7499  | 2.2510  | 0.9971  | 0.7931  | 0.9250  | 0.3015  | 0.0586  |        |         |        |         |        |         |        |
|          | g <sub>Y</sub> | 433.162 | 2.6993  | 356.902 | 2.7421  | 528.949 | 1.8170  | 445.090 | 1.6862 | 548.205 | 1.6852 | 462.642 | 0.7924 | 467.423 | 0.9964 |
|          | g <sub>Z</sub> | 11.4785 | 14.0593 | 11.6430 | 14.1355 | 11.8754 | 14.4359 | 14.3222 |        |         |        |         |        |         |        |
| <b>7</b> | g <sub>X</sub> | 1.1582  | 0.0212  | 1.1789  | 0.3853  | 1.1339  | 0.3900  | 0.4573  |        |         |        |         |        |         |        |
|          | g <sub>Y</sub> | 468.077 | 2.0754  | 400.951 | 0.2793  | 585.554 | 1.3381  | 505.520 | 0.7648 | 609.094 | 1.2925 | 518.103 | 0.8495 | 525.846 | 0.7984 |
|          | g <sub>Z</sub> | 17.3457 | 19.3168 | 17.4645 | 19.3723 | 16.9870 | 19.2337 | 19.3234 |        |         |        |         |        |         |        |
| <b>8</b> | g <sub>X</sub> | 0.2736  | 0.2124  | 0.0853  | 0.2601  | 0.0083  | 0.2303  | 0.1844  |        |         |        |         |        |         |        |
|          | g <sub>Y</sub> | 512.690 | 0.5845  | 436.098 | 0.3880  | 628.383 | 0.1606  | 539.766 | 0.5962 | 657.864 | 0.1064 | 561.729 | 0.6035 | 571.403 | 0.4624 |
|          | g <sub>Z</sub> | 18.3891 | 18.4214 | 18.8871 | 18.8265 | 18.9738 | 18.9091 | 19.0735 |        |         |        |         |        |         |        |

Table S8. Energies (cm<sup>-1</sup>) and g tensors of the lowest Kramers doublets (KD) (*method 2*).

| KD       | A1             |         | A2      |         | B1      |         | B2      |         | C1     |         | C2     |         | C3     |         |        |
|----------|----------------|---------|---------|---------|---------|---------|---------|---------|--------|---------|--------|---------|--------|---------|--------|
|          | E              | g       | E       | g       | E       | g       | E       | g       | E      | g       | E      | g       | E      | g       |        |
| <b>1</b> | g <sub>X</sub> | 0.0085  | 0.0035  | 0.0050  | 0.0008  | 0.0052  | 0.0010  | 0.0010  |        |         |        |         |        |         |        |
|          | g <sub>Y</sub> | 0.000   | 0.0140  | 0.000   | 0.0146  | 0.000   | 0.0082  | 0.000   | 0.0021 | 0.000   | 0.0021 | 0.000   | 0.0021 |         |        |
|          | g <sub>Z</sub> | 19.7207 | 19.8209 | 19.7321 | 19.8216 | 19.7255 | 19.8113 | 19.8101 |        |         |        |         |        |         |        |
| <b>2</b> | g <sub>X</sub> | 0.1469  | 0.0285  | 0.0883  | 0.0705  | 0.0916  | 0.0030  | 0.0087  |        |         |        |         |        |         |        |
|          | g <sub>Y</sub> | 154.921 | 0.1957  | 59.269  | 0.0345  | 184.185 | 0.1124  | 166.097 | 0.1697 | 189.082 | 0.1175 | 172.300 | 0.0220 | 176.025 | 0.0346 |
|          | g <sub>Z</sub> | 16.8010 | 19.8135 | 16.8452 | 17.0243 | 16.8239 | 17.0680 | 17.0586 |        |         |        |         |        |         |        |
| <b>3</b> | g <sub>X</sub> | 1.9425  | 0.3428  | 1.1524  | 0.1971  | 1.1898  | 0.4716  | 0.4261  |        |         |        |         |        |         |        |
|          | g <sub>Y</sub> | 308.508 | 2.9584  | 135.599 | 0.4139  | 373.517 | 1.5976  | 216.210 | 0.3917 | 383.749 | 1.6770 | 266.583 | 0.5064 | 262.595 | 0.4374 |
|          | g <sub>Z</sub> | 12.7828 | 16.9041 | 13.5191 | 19.4391 | 13.4469 | 19.4033 | 19.4439 |        |         |        |         |        |         |        |
| <b>4</b> | g <sub>X</sub> | 0.6275  | 8.7862  | 7.3010  | 2.9079  | 5.6090  | 1.7498  | 1.9619  |        |         |        |         |        |         |        |
|          | g <sub>Y</sub> | 372.970 | 1.0567  | 243.103 | 8.5153  | 491.334 | 6.7837  | 326.555 | 3.0258 | 505.677 | 6.6107 | 344.067 | 2.4932 | 348.429 | 2.5423 |
|          | g <sub>Z</sub> | 18.7071 | 4.5239  | 5.6723  | 12.5908 | 7.6501  | 12.8537 | 12.8581 |        |         |        |         |        |         |        |
| <b>5</b> | g <sub>X</sub> | 3.6619  | 1.1972  | 0.3801  | 8.4348  | 0.3286  | 8.0066  | 8.0980  |        |         |        |         |        |         |        |
|          | g <sub>Y</sub> | 395.360 | 5.8769  | 304.860 | 2.5716  | 527.667 | 0.9307  | 412.586 | 7.2532 | 564.645 | 0.9465 | 442.294 | 7.1333 | 445.506 | 7.2355 |
|          | g <sub>Z</sub> | 9.8221  | 9.8550  | 18.6080 | 4.3054  | 17.9682 | 5.6743  | 5.4345  |        |         |        |         |        |         |        |
| <b>6</b> | g <sub>X</sub> | 1.2680  | 1.9168  | 0.3400  | 0.4067  | 0.3369  | 0.4246  | 0.4681  |        |         |        |         |        |         |        |
|          | g <sub>Y</sub> | 471.266 | 2.1834  | 394.807 | 2.4444  | 581.309 | 2.3310  | 498.503 | 1.2896 | 604.761 | 1.9522 | 520.285 | 0.7080 | 526.797 | 0.6001 |
|          | g <sub>Z</sub> | 11.4567 | 13.8583 | 11.9459 | 13.9630 | 12.8677 | 14.1059 | 14.0454 |        |         |        |         |        |         |        |
| <b>7</b> | g <sub>X</sub> | 1.2264  | 0.1886  | 1.1129  | 0.5387  | 1.0393  | 0.5236  | 0.5562  |        |         |        |         |        |         |        |
|          | g <sub>Y</sub> | 512.274 | 1.9901  | 452.830 | 0.3076  | 644.284 | 1.1364  | 573.093 | 0.6054 | 670.414 | 1.1414 | 587.106 | 0.6956 | 597.470 | 0.6565 |
|          | g <sub>Z</sub> | 17.3740 | 19.6369 | 17.3164 | 19.4832 | 16.7753 | 19.4339 | 19.4099 |        |         |        |         |        |         |        |

|          |                |         |         |         |         |         |         |         |
|----------|----------------|---------|---------|---------|---------|---------|---------|---------|
| <b>8</b> | g <sub>x</sub> | 0.1596  | 0.1597  | 0.0225  | 0.0859  | 0.1100  | 0.0871  | 0.0587  |
|          | g <sub>y</sub> | 560.421 | 486.339 | 692.225 | 607.687 | 725.904 | 632.845 | 645.697 |
|          | g <sub>z</sub> | 18.6717 | 18.8922 | 18.9929 | 19.2913 | 19.0174 | 19.2604 | 19.3829 |

**Method 2** (the multiplet-specific root optimization at the CASSCF level) is more accurate for the low-lying levels than **Method 1** (single-state average CASSCF calculation including all roots from different ionic multiplets) because the orbitals are better optimized when only roots of similar energy are taken into account. A state-average CASSCF calculation including roots which have very different energies is less accurate because for all the roots one single set of orbitals is optimized. This is reflected in the later stage (RASSI) when spin-orbit coupling is included. The best results correspond to C2 and C3 in Tables S6 and S8 and almost do not differ from each other.

Table S9. Angles between the main magnetic axes of the lowest Kramers doublet obtained in different computational approximations (degrees)

|    | A1        | A2        | B1        | B2        | C1        | C2        | C3        |
|----|-----------|-----------|-----------|-----------|-----------|-----------|-----------|
| A1 | 5.467E-06 | 7.826E-05 | 4.398E-05 | 6.864E-05 | 3.740E-05 | 7.897E-05 | 4.017E-05 |
| A2 | 7.826E-05 | 8.538E-07 | 5.925E-05 | 7.232E-05 | 7.743E-05 | 7.862E-05 | 6.713E-05 |
| B1 | 4.398E-05 | 5.925E-05 | 8.365E-06 | 2.789E-05 | 2.160E-05 | 3.800E-05 | 1.213E-05 |
| B2 | 6.864E-05 | 7.232E-05 | 2.789E-05 | 7.143E-06 | 3.589E-05 | 1.228E-05 | 2.996E-05 |
| C1 | 3.740E-05 | 7.743E-05 | 2.160E-05 | 3.589E-05 | 9.993E-06 | 4.515E-05 | 1.451E-05 |
| C2 | 7.897E-05 | 7.862E-05 | 3.800E-05 | 1.228E-05 | 4.515E-05 | 5.051E-06 | 3.997E-05 |
| C3 | 4.017E-05 | 6.713E-05 | 1.213E-05 | 2.996E-05 | 1.451E-05 | 3.997E-05 | 8.873E-06 |

Table S10. Angle between the main magnetic axes of the lowest Kramers doublet and the Dy-C bond (degrees).

|       | A1        | A2        | B1        | B2        | C1        | C2        | C3        |
|-------|-----------|-----------|-----------|-----------|-----------|-----------|-----------|
| angle | 5.313E-05 | 6.064E-05 | 1.145E-05 | 1.811E-05 | 2.563E-05 | 2.807E-05 | 1.620E-05 |

Table S11. Angle between the main magnetic axes of the lowest and first excited Kramers doublets (degrees).

|       | A1        | A2                  | B1        | B2        | C1        | C2        | C3        |
|-------|-----------|---------------------|-----------|-----------|-----------|-----------|-----------|
| angle | 1.943E-04 | 90.000 <sup>a</sup> | 2.197E-05 | 2.756E-05 | 3.445E-05 | 3.371E-05 | 4.106E-05 |

<sup>a</sup>. Only the A2 model predicts a non-collinear arrangement of the main magnetic axes in the ground and first excited doublets. We can see from the above tables that the approximation A2 gives predictions which differ strongly from all other approximations and, therefore, cannot be trusted. The approximations corresponding to highest accuracy, C2 and C3, give very close results.



Table S12. Comparison of the results predicted by various active spaces of the CASSCF method. All calculations were similar to the A1 model shown above. The calculations involved a state-average orbital optimization for all spin sextet ( ${}^6\text{H}$ ,  ${}^6\text{F}$  and  ${}^6\text{P}$ ). CAS( $n,m$ ) represents an active space of  $n$  electrons spanning  $m$  orbitals.

| KD |       | CAS(9,7) |         | CAS(11,9) |         | CAS(15,11) |         | CAS(15,13) |         |
|----|-------|----------|---------|-----------|---------|------------|---------|------------|---------|
|    |       | E        | $g$     | E         | $g$     | E          | $g$     |            |         |
| 1  | $g_x$ |          | 0.0111  |           | 0.0087  |            | 0.0094  |            | 0.0082  |
|    | $g_y$ | 0.000    | 0.0188  | 0.000     | 0.0143  | 0.000      | 0.0156  | 0.000      | 0.0135  |
|    | $g_z$ |          | 19.8036 |           | 19.8264 |            | 19.8201 |            | 19.8312 |
| 2  | $g_x$ |          | 0.1847  |           | 0.1506  |            | 0.1606  |            | 0.1489  |
|    | $g_y$ | 142.599  | 0.2490  | 150.070   | 0.2002  | 147.322    | 0.2141  | 152.542    | 0.1994  |
|    | $g_z$ |          | 16.8322 |           | 16.8842 |            | 16.8719 |            | 16.8829 |
| 3  | $g_x$ |          | 2.4029  |           | 2.0655  |            | 2.1908  |            | 2.0194  |
|    | $g_y$ | 285.332  | 3.8316  | 298.706   | 3.0492  | 294.003    | 3.3047  | 301.220    | 3.0310  |
|    | $g_z$ |          | 12.2785 |           | 12.7827 |            | 12.6226 |            | 12.7977 |
| 4  | $g_x$ |          | 0.1939  |           | 0.3288  |            | 0.2816  |            | 0.4075  |
|    | $g_y$ | 329.343  | 0.4423  | 346.647   | 0.6738  | 339.412    | 0.6086  | 354.868    | 0.7572  |
|    | $g_z$ |          | 19.3622 |           | 19.2335 |            | 19.2609 |            | 19.1610 |
| 5  | $g_x$ |          | 9.3287  |           | 3.7903  |            | 3.4892  |            | 3.8011  |
|    | $g_y$ | 362.812  | 6.3287  | 382.117   | 6.0877  | 375.057    | 6.1777  | 384.930    | 6.0501  |
|    | $g_z$ |          | 3.0364  |           | 9.6003  |            | 9.5774  |            | 9.6324  |
| 6  | $g_x$ |          | 0.8618  |           | 1.0840  |            | 0.9821  |            | 1.1217  |
|    | $g_y$ | 439.033  | 2.8775  | 454.931   | 2.3389  | 448.789    | 2.5997  | 458.444    | 2.2374  |
|    | $g_z$ |          | 11.3640 |           | 11.7858 |            | 11.6301 |            | 11.7311 |
| 7  | $g_x$ |          | 1.2140  |           | 1.1518  |            | 1.1857  |            | 1.1658  |
|    | $g_y$ | 474.408  | 2.2602  | 493.241   | 2.0520  | 485.836    | 2.1673  | 497.919    | 1.9806  |
|    | $g_z$ |          | 17.2676 |           | 17.5670 |            | 17.4427 |            | 17.5957 |
| 8  | $g_x$ |          | 0.3163  |           | 0.2554  |            | 0.2875  |            | 0.2095  |
|    | $g_y$ | 520.129  | 0.6447  | 538.879   | 0.6554  | 531.628    | 0.6648  | 543.755    | 0.5708  |
|    | $g_z$ |          | 18.4036 |           | 18.5269 |            | 18.4793 |            | 18.6249 |

We notice minor changes in the local spectrum and anisotropy of individual Kramers doublets upon increasing the size of the active space.

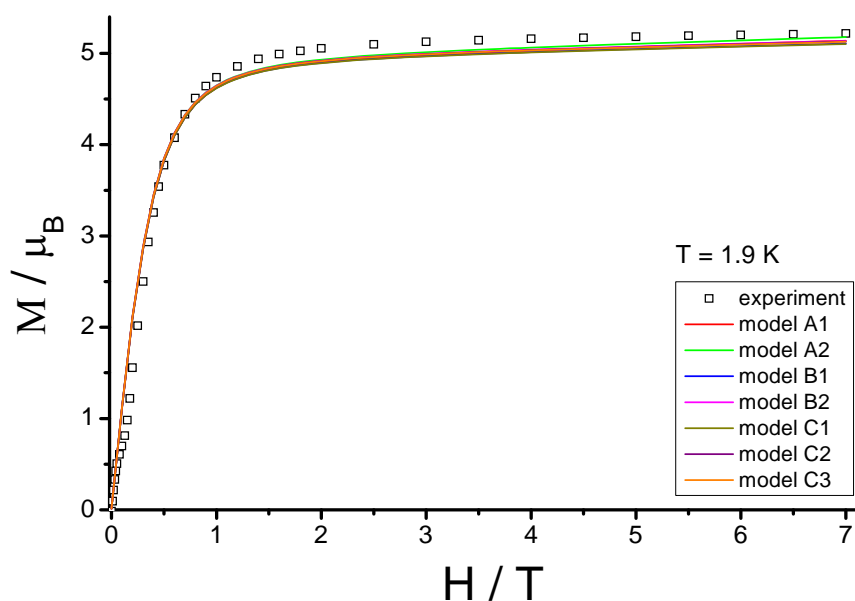

Fig. S3 Measured and calculated molar magnetization at 1.9 K.

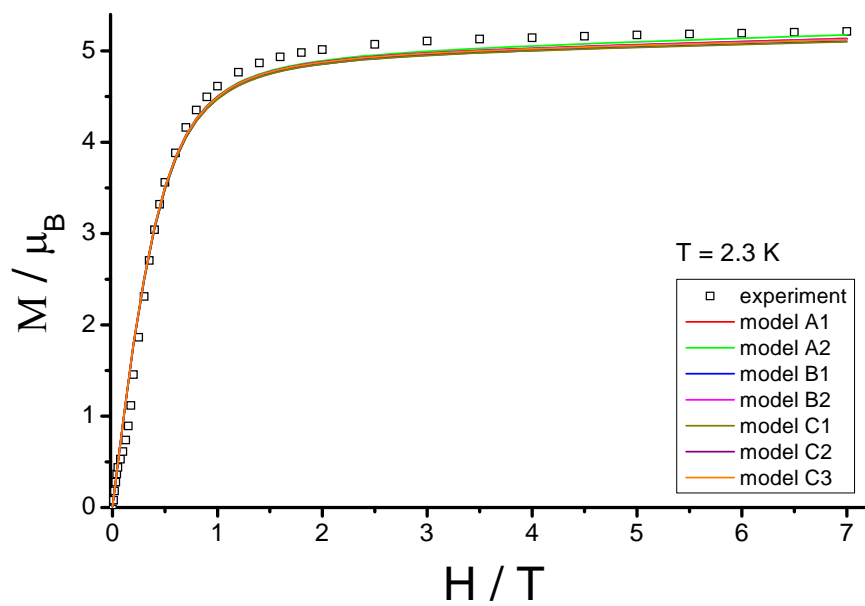

Fig. S4 Measured and calculated molar magnetization at 2.3 K.

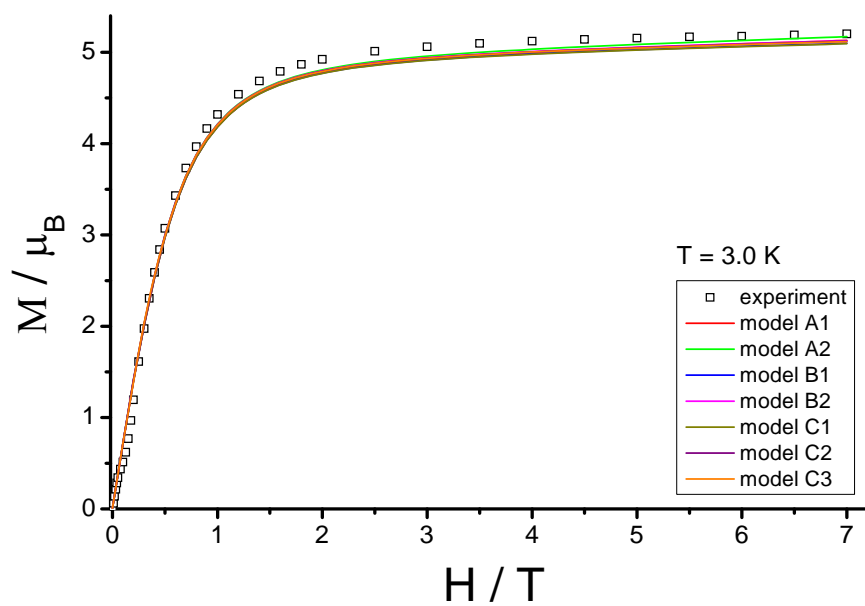

Fig. S5 Measured and calculated molar magnetization at 3.0 K.

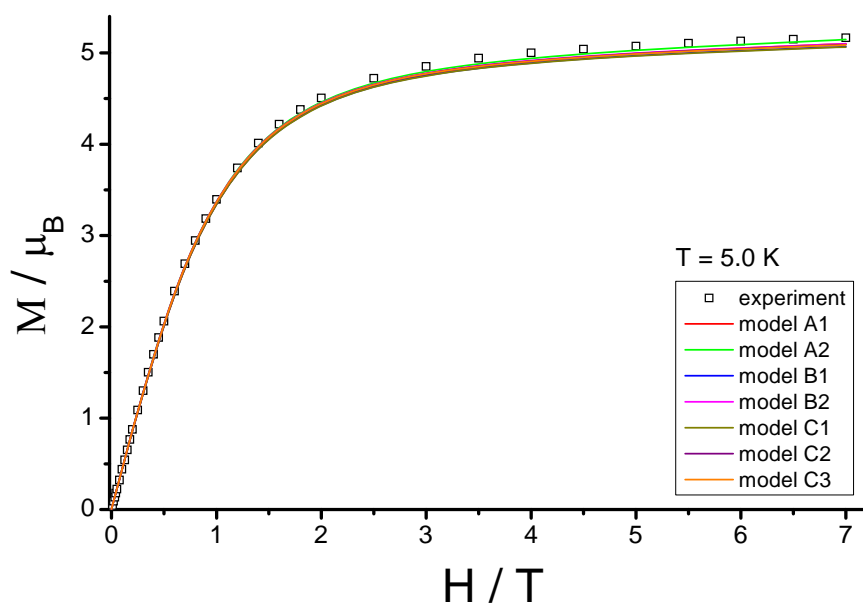

Fig. S6 Measured and calculated molar magnetization at 5.0 K.

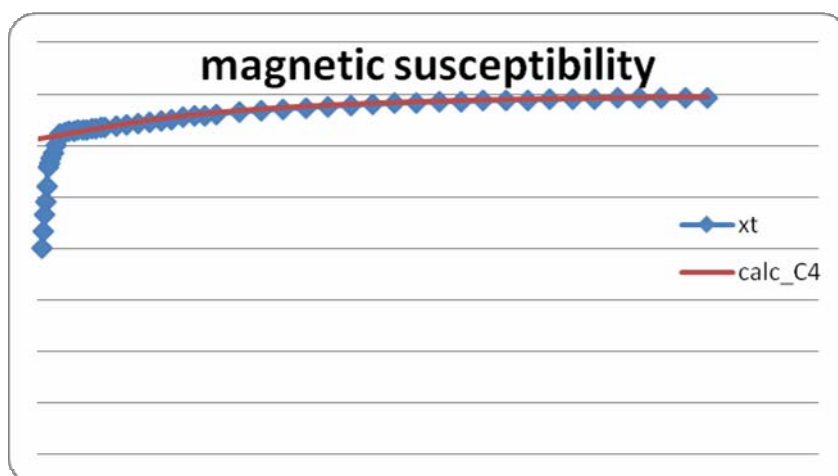

Fig. S7 Ab initio calculations of temperature dependence of powder susceptibility for an individual DyNCN complex (lines) and their comparison with experiment (diamonds). The intermolecular magnetic interaction was not taken into account. The  $\chi_M T$  at around 10 K shows a kink, which is not expected for molecular susceptibility. The kink cannot be due to magnetic ordering since intermolecular dipolar interaction is much weaker. This phenomenon may probably a kind of structural phase transition (for instance ordering of solvent molecules) which suddenly changes the crystal field at the Dy site and its magnetic properties. However these changes are not large, otherwise the calculations based on the room temperature geometry would not have sense.

### 3 Inelastic neutron scattering measurements

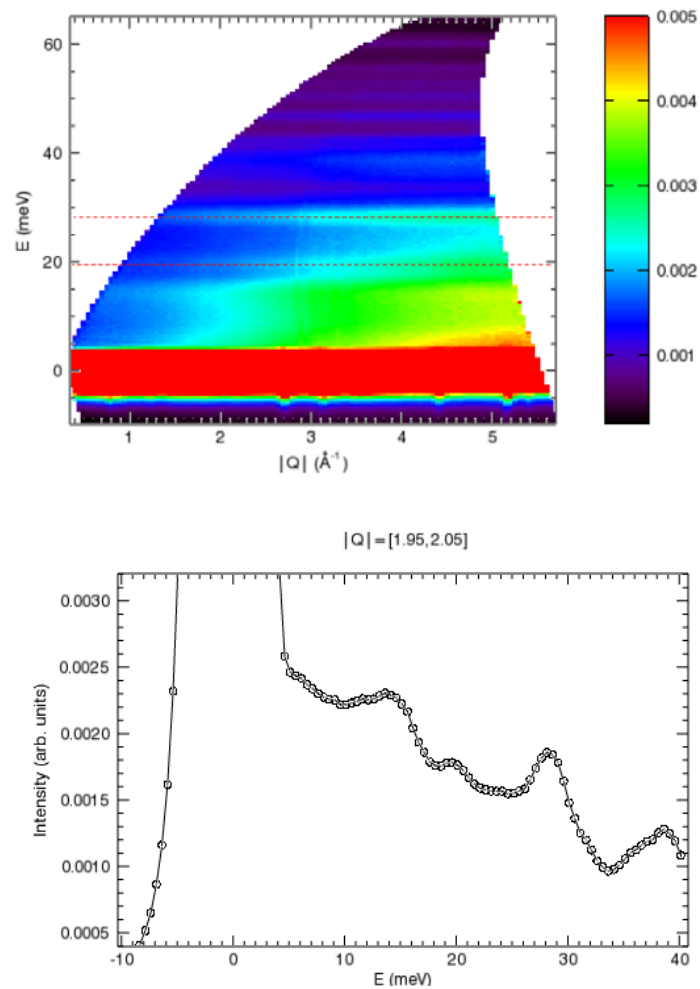

Fig. S8 (Top) Color map of Inelastic neutron scattering spectra of DyNCN taken at the  $E_i \sim 70$  meV Fermi Chopper 1 at 240 Hz. (Bottom) Low Q data of inelastic neutron scattering spectra of **DyNCN** taken at the  $E_i \sim 70$  meV Fermi Chopper 1 at 240 Hz. There are more peaks that are probably libration or rotation motions of the H.

## 4 Alternating current (ac) magnetic susceptibility measurements

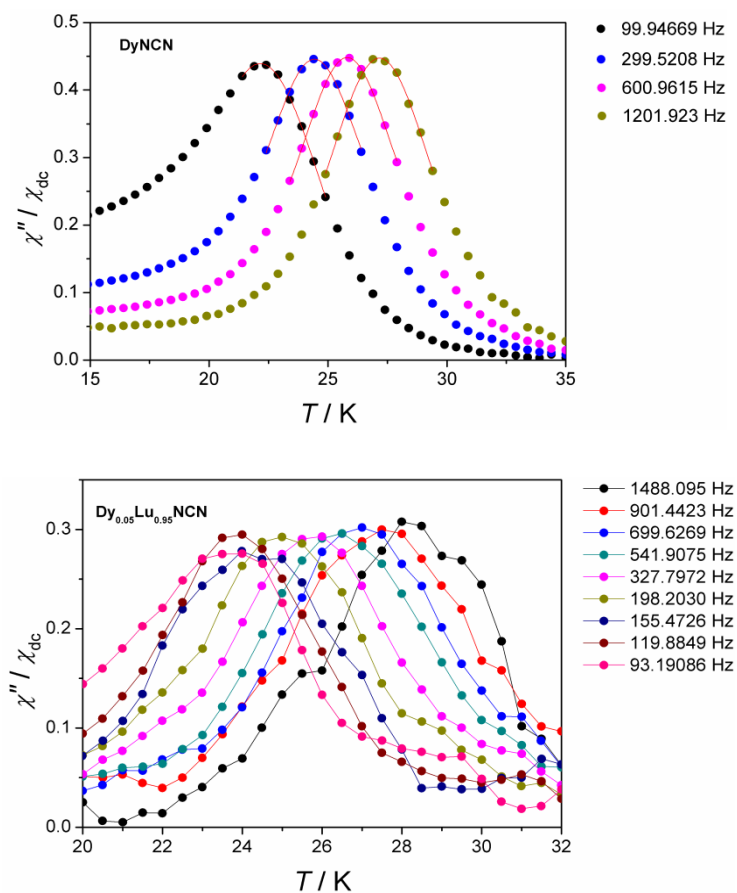

Fig. S9 Temperature dependence of out-of-phase ( $\chi''$ ) component of ac magnetic susceptibility for DyNCN (Top) and Dy<sub>0.05</sub>Lu<sub>0.95</sub>NCN (bottom) in zero static field. The  $\chi''$  data are normalized at each temperature by the corresponding value of  $\chi_{dc}$  from the data in Fig. S7.

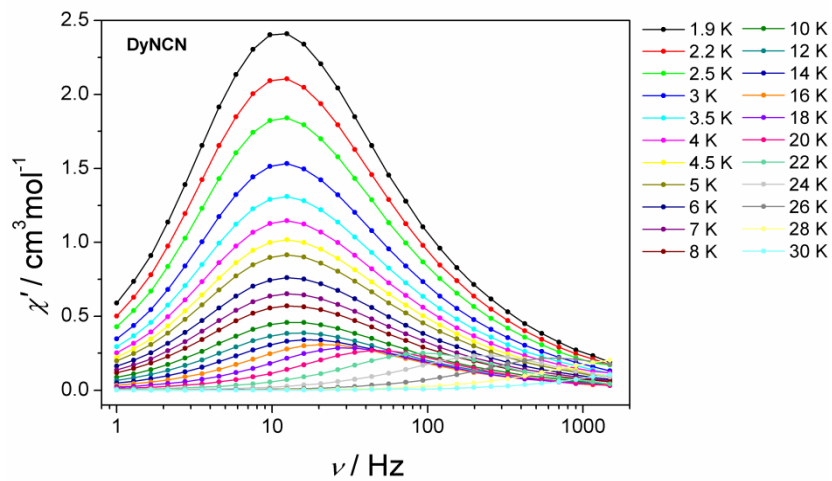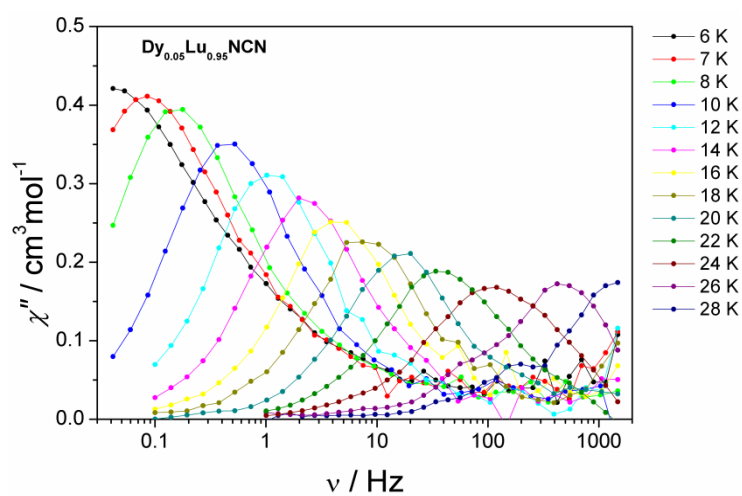

Fig. S10 Frequency dependence of  $\chi''$  component of ac magnetic susceptibility for for DyNCN (left) and Dy<sub>0.05</sub>Lu<sub>0.95</sub>NCN (right) in zero static field.

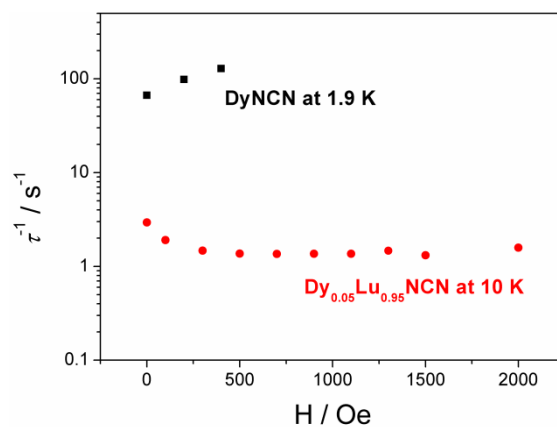

Fig. S11 The dependence of relaxation rate  $\tau^{-1}$  on the external magnetic field  $H$  for DyNCN and Dy<sub>0.05</sub>Lu<sub>0.95</sub>NCN.

## 5 References

1. (a) F. Aquilante, L. De Vico, N. Ferre, G. Ghigo, P. Å. Malmqvist, P. Neogady, T. B. Pedersen, M. Pitonak, M. Reiher, B. O. Roos, L. Serrano-Andres, M. Urban, V. Veryazov and R. Lindh, *J. Comput. Chem.*, 2010, **31**, 224; (b) L. Ungur and L. F. Chibotaru, SINGLE\_ANISO program in MOLCAS (<http://molcas.org/documentation/manual/node95.html>).
2. B. A. Hess, C. M. Marian, U. Wahlgren and O. Gropen, *Chem. Phys. Lett.*, 1996, **251**, 365.
3. B. O. Roos and P. Å. Malmqvist, *Phys. Chem. Chem. Phys.*, 2004, **6**, 2919.
4. P. Å. Malmqvist, B. O. Roos and B. Schimmelpfennig, *Chem. Phys. Lett.*, 2002, **357**, 230.
5. (a) L. F. Chibotaru, L. Ungur and A. Soncini, *Angew. Chem. Int. Ed.*, 2008, **47**, 4126; (b) L. Ungur, W. V. d. Heuvel and L. F. Chibotaru, *New J. Chem.*, 2009, **33**, 1224; (c) P.-H. Guo, J.-L. Liu, Z.-M. Zhang, L. Ungur, L. F. Chibotaru, J.-D. Leng, F.-S. Guo and M.-L. Tong, *Inorg. Chem.*, 2012, **51**, 1233; (d) G. Novitchi, G. Pilet, L. Ungur, V. V. Moshchalkov, W. Wernsdorfer, L. F. Chibotaru, D. Luneau and A. K. Powell, *Chem. Sci.*, 2012, **3**, 1169; (e) S. K. Langley, L. Ungur, N. F. Chilton, B. Moubaraki, L. F. Chibotaru and K. S. Murray, *Chem. – Eur. J.*, 2011, **17**, 9209.
